# Supplementary material
Source: HighWire-hosted journal article supplement (https://erj.ersjournals.com/content/56/3/2002918)
Supplement: inline-supplementary-material-1 [file inline-supplementary-material-1.pdf]

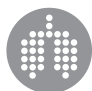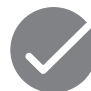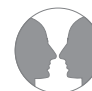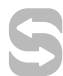

SHAREABLE PDF

# Reply to “COVID-19 prediction models should adhere to methodological and reporting standards”

Guangyao Wu<sup>1</sup>, Henry C. Woodruff <sup>1,2</sup>, Avishek Chatterjee<sup>1</sup> and Philippe Lambin <sup>1,2</sup>

**Affiliations:** <sup>1</sup>The D-Lab, Dept of Precision Medicine, GROW - School for Oncology, Maastricht University Medical Center+, Maastricht, The Netherlands. <sup>2</sup>Dept of Radiology and Nuclear Medicine, GROW- School for Oncology and Developmental Biology, Maastricht University Medical Center+, Maastricht, The Netherlands.

**Correspondence:** Guangyao Wu, The D-Lab, Dept of Precision Medicine, GROW - School for Oncology, Maastricht University Medical Center+, 6229 ER, Maastricht, The Netherlands. E-mail: g.wu@maastrichtuniversity.nl

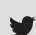

@ERSpublications

**It is hard to follow a standardised methodology for prediction models, while researchers should adhere to generally accepted reporting standards according to research needs and journal submission requirements** <https://bit.ly/30zfMIw>

**Cite this article as:** Wu G, Woodruff HC, Chatterjee A, *et al.* Reply to “COVID-19 prediction models should adhere to methodological and reporting standards”. *Eur Respir J* 2020; 56: 2002918 [<https://doi.org/10.1183/13993003.02918-2020>].

This single-page version can be shared freely online.

## From the authors:

We would like to thank G.S. Collins, M. van Smeden, and R.D. Riley for their commentary on the design, analysis, and reporting of our article [1]. However, their comments seem to stem from a traditional biostatistics angle rather than from a translational research machine-learning approach and the overwhelming majority of criticisms arise from either misunderstandings or misreading.
